# Supplementary material
Source: PubMed Central journal article supplement (PMC4547899)

Figure 5 – panel D

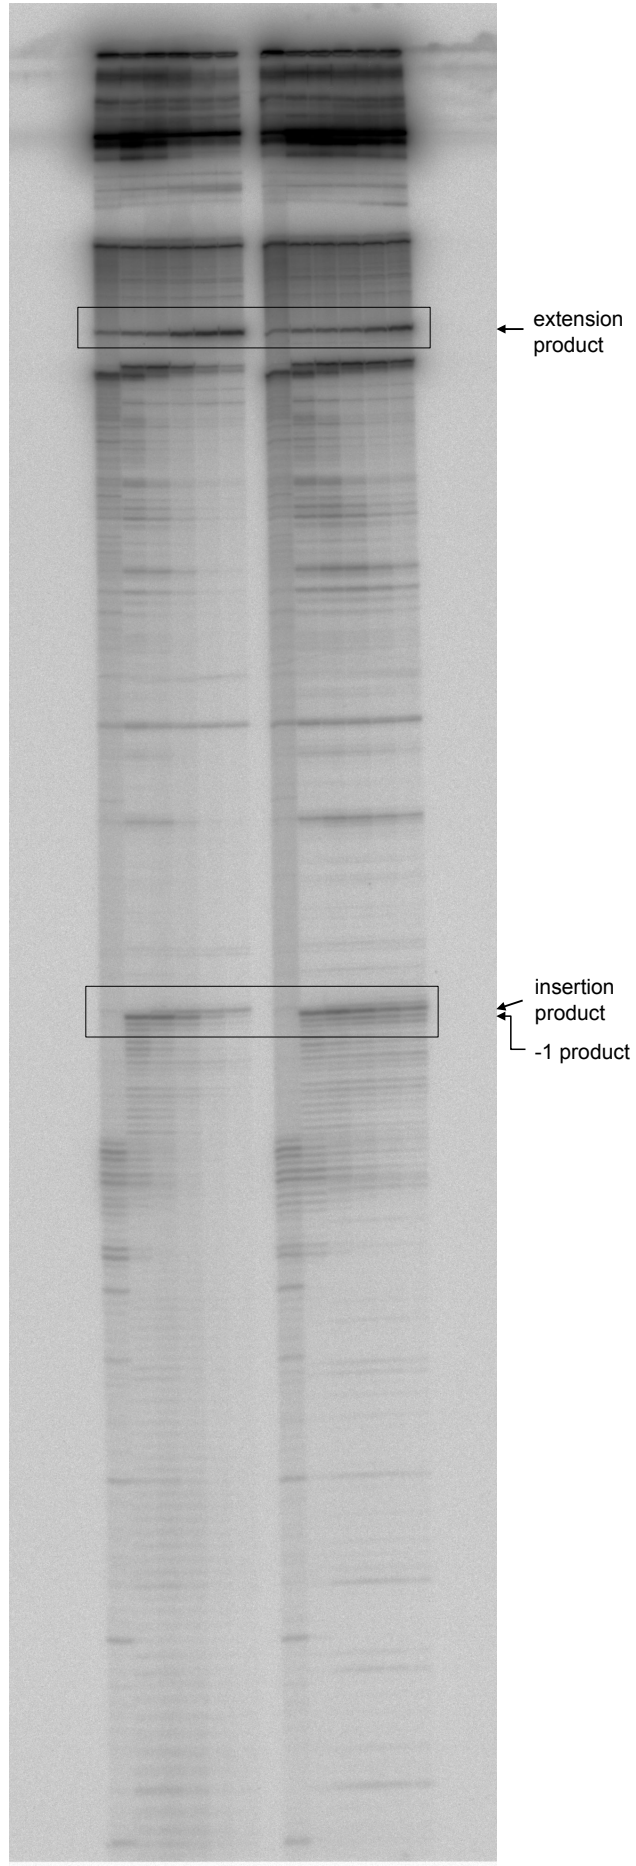

Figure 5 – panel G

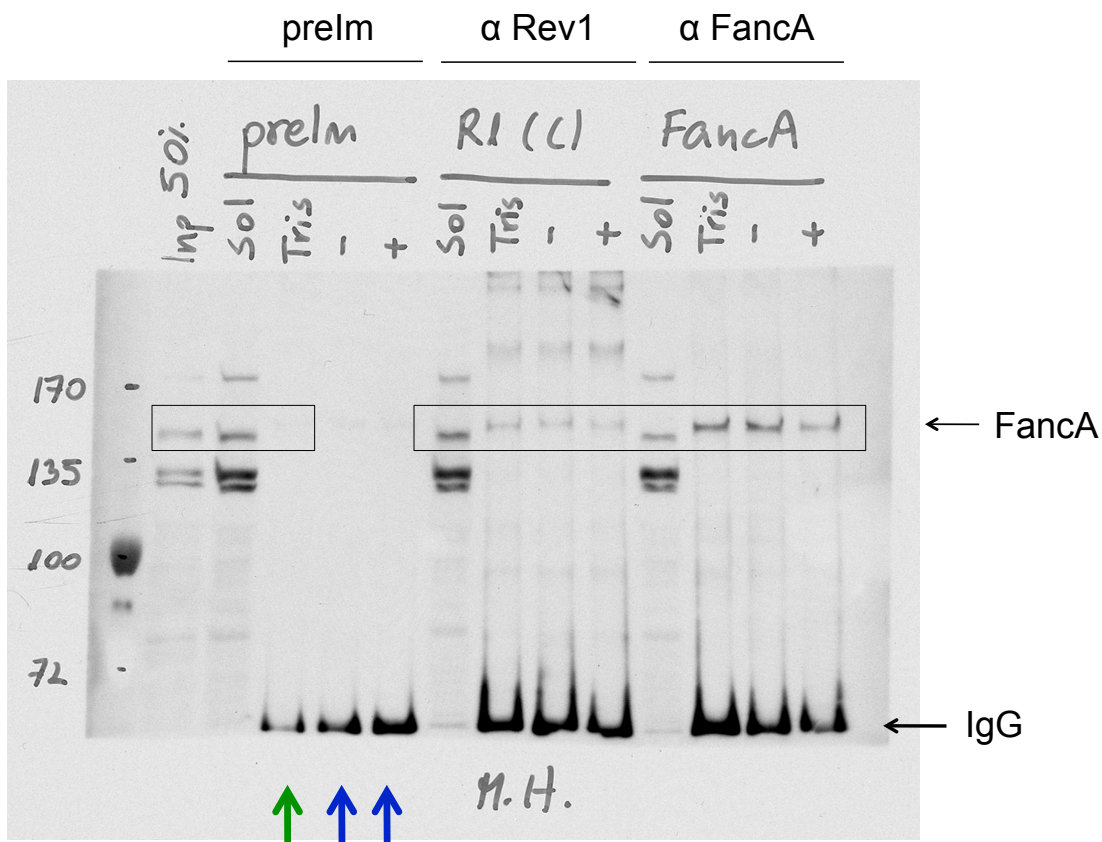

“Tris”: no DNA IP  
 “-”: pICL - benzonase  
 “+”: pICL + benzonase  
 “M.H.”: name of anti-FancA antibodies

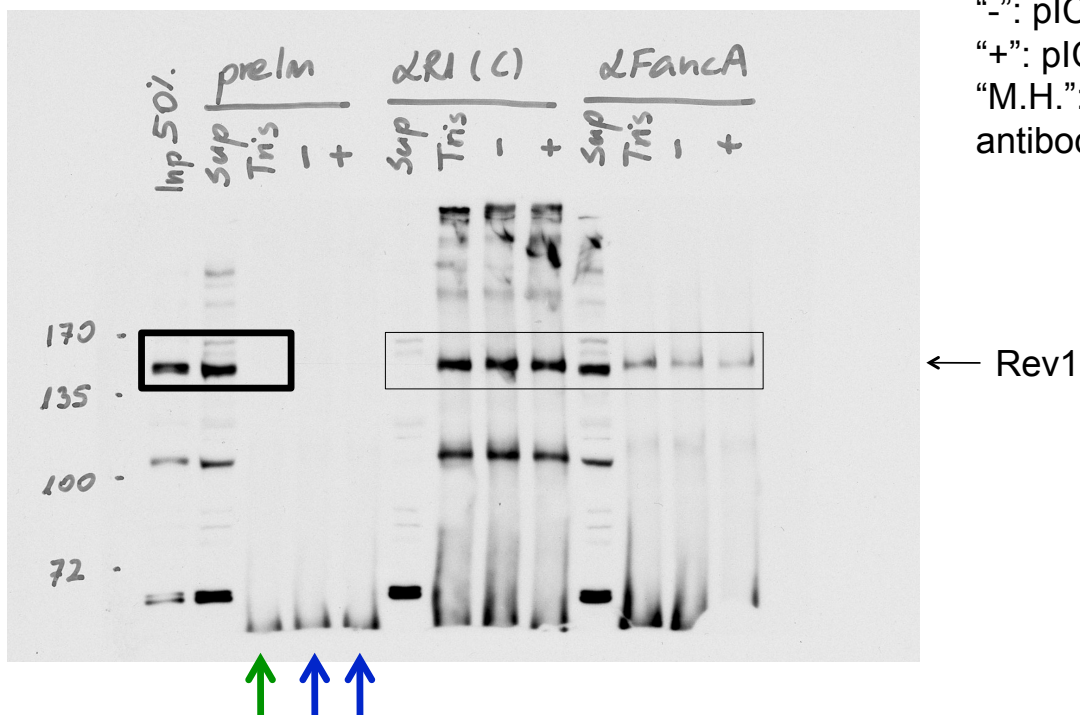

Supplement: embj0034-1971-sd10.pdf [file embj0034-1971-sd10.pdf]
