# Supplementary material
Source: PubMed Central journal article supplement (PMC4547899)

Figure 6 – panel A

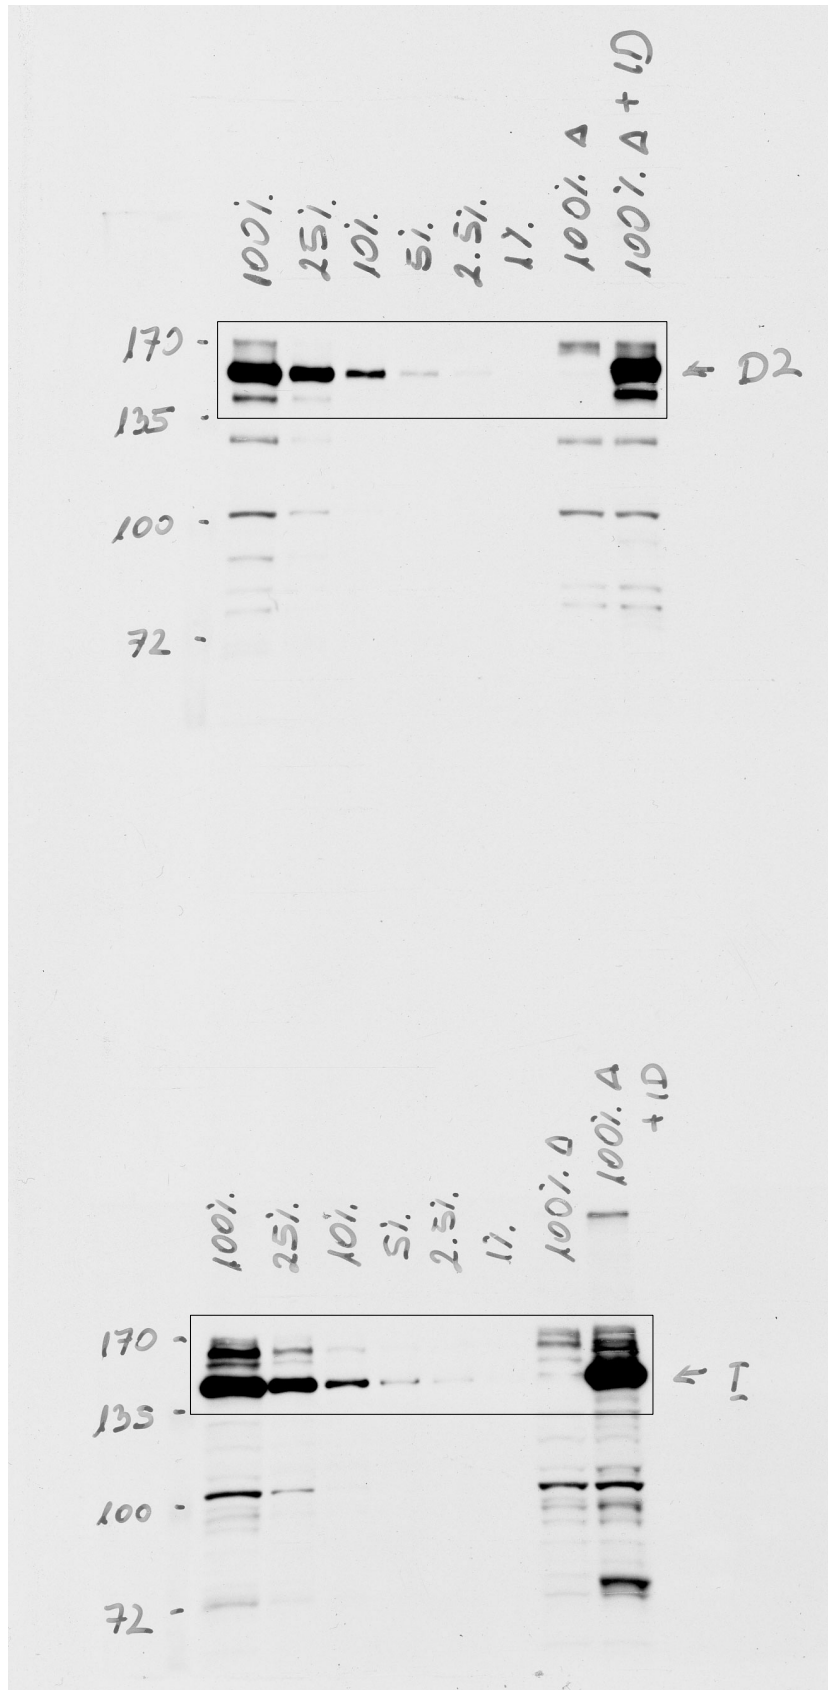

Figure 6 – panel B

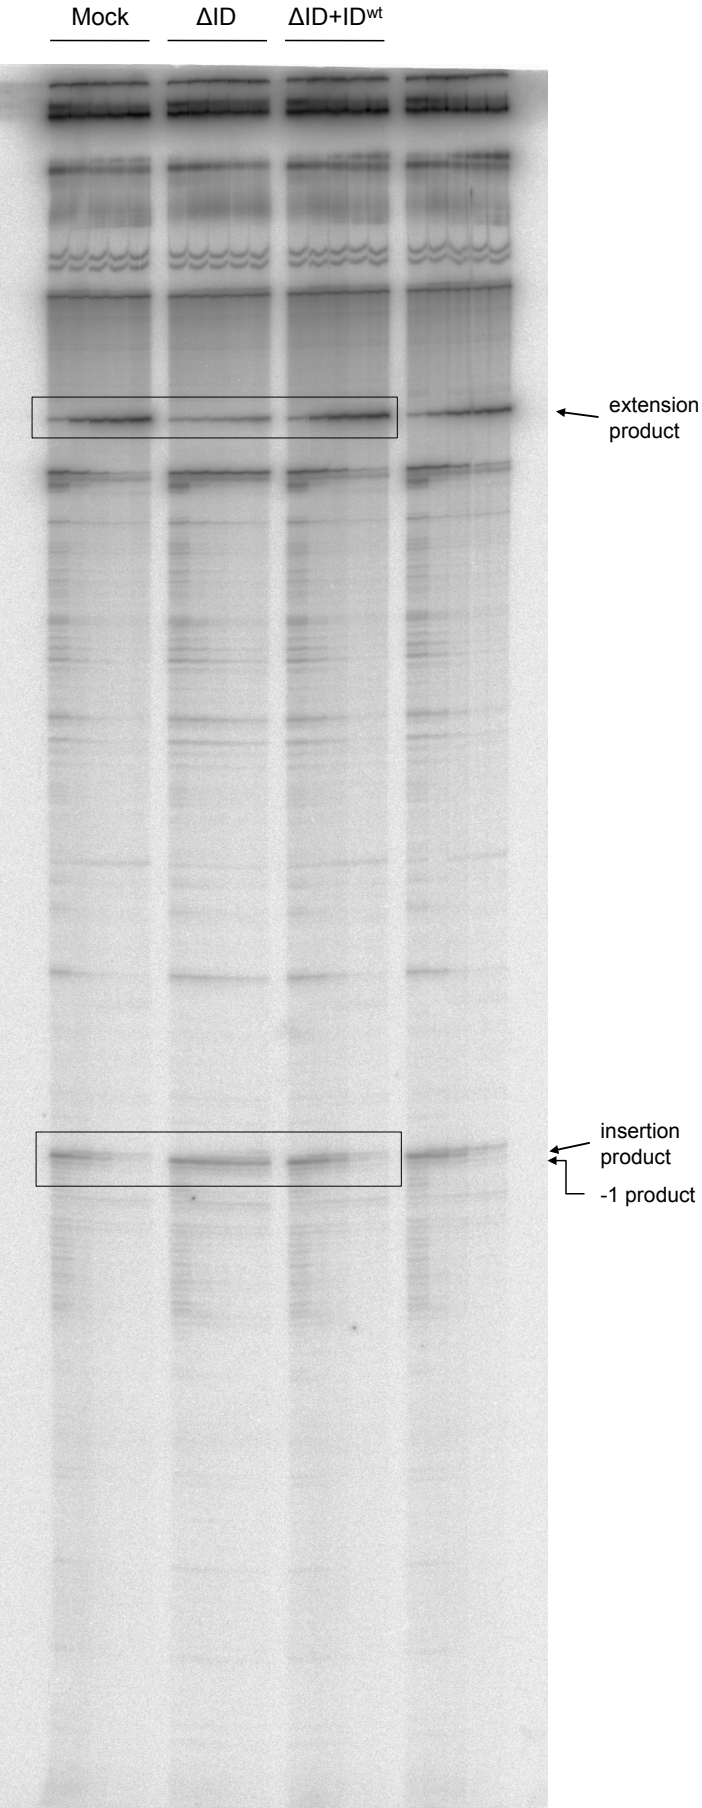

Supplement: embj0034-1971-sd11.pdf [file embj0034-1971-sd11.pdf]

**Supplementary Figure S3**

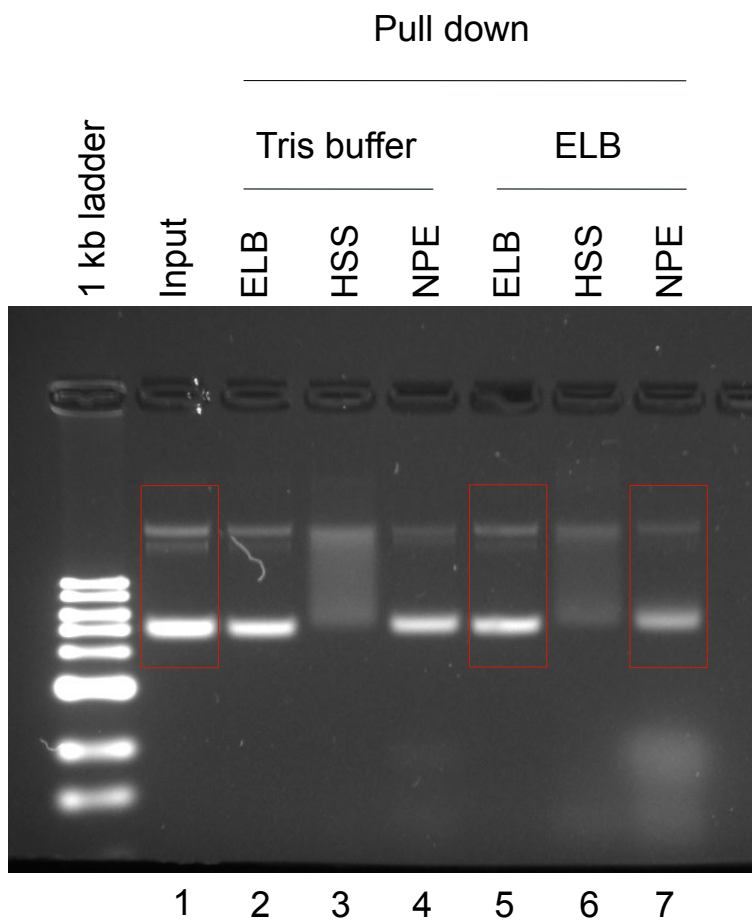

Supplement: embj0034-1971-sd2.pdf [file embj0034-1971-sd2.pdf]

Supplementary Figure S4

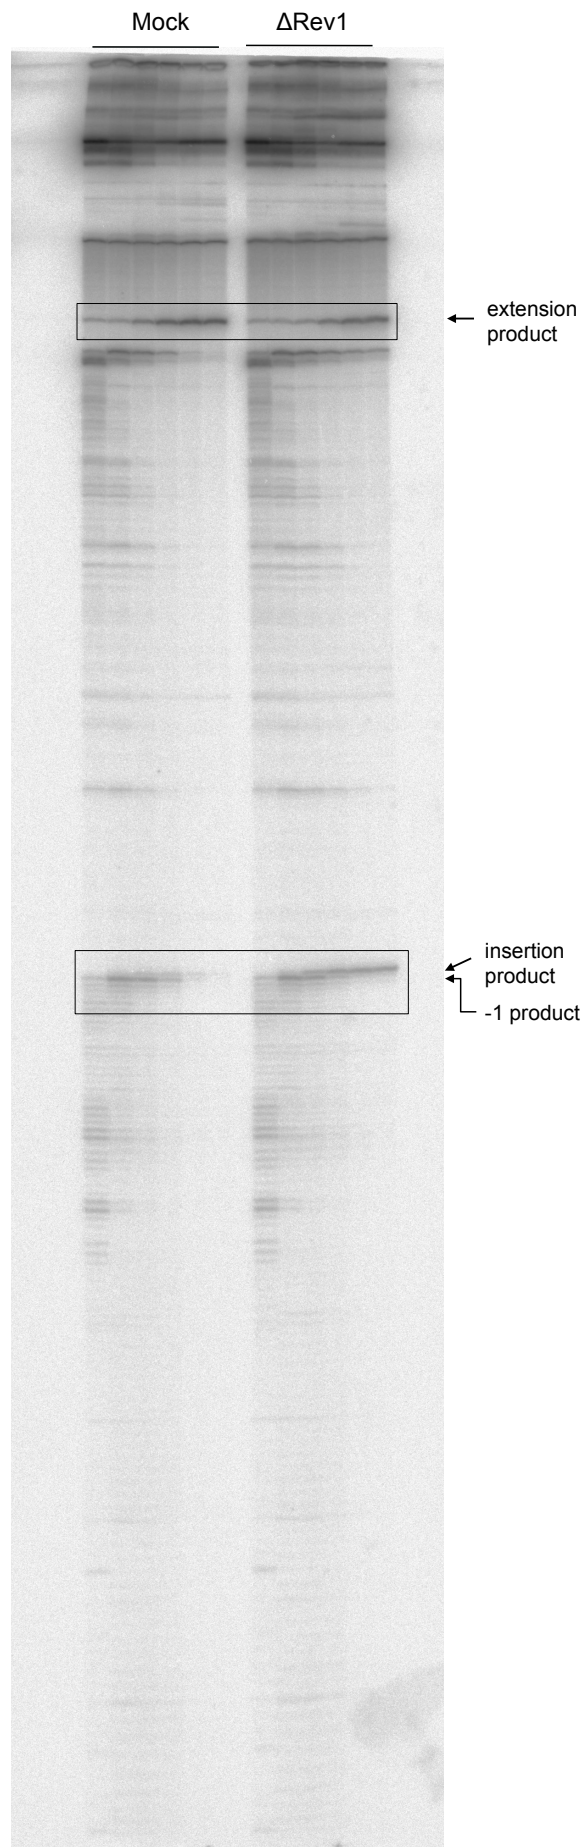

Supplement: embj0034-1971-sd3.pdf [file embj0034-1971-sd3.pdf]

Supplementary Figure S5 – Panel A

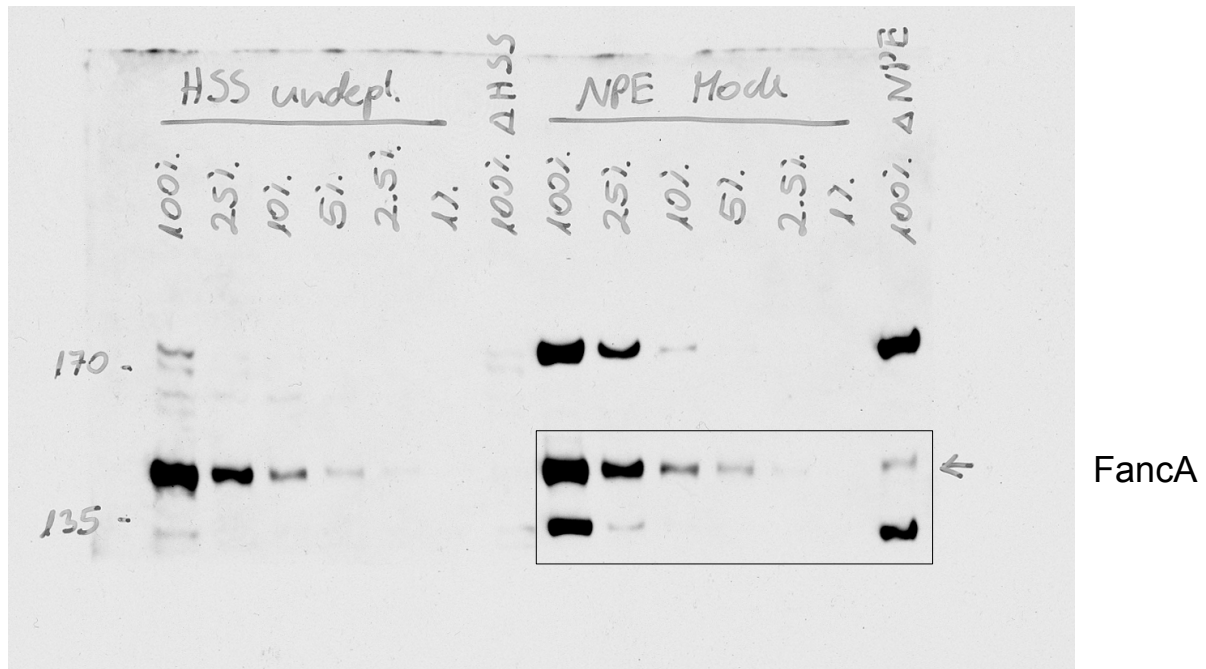

Supplementary Figure S5 – Panel B

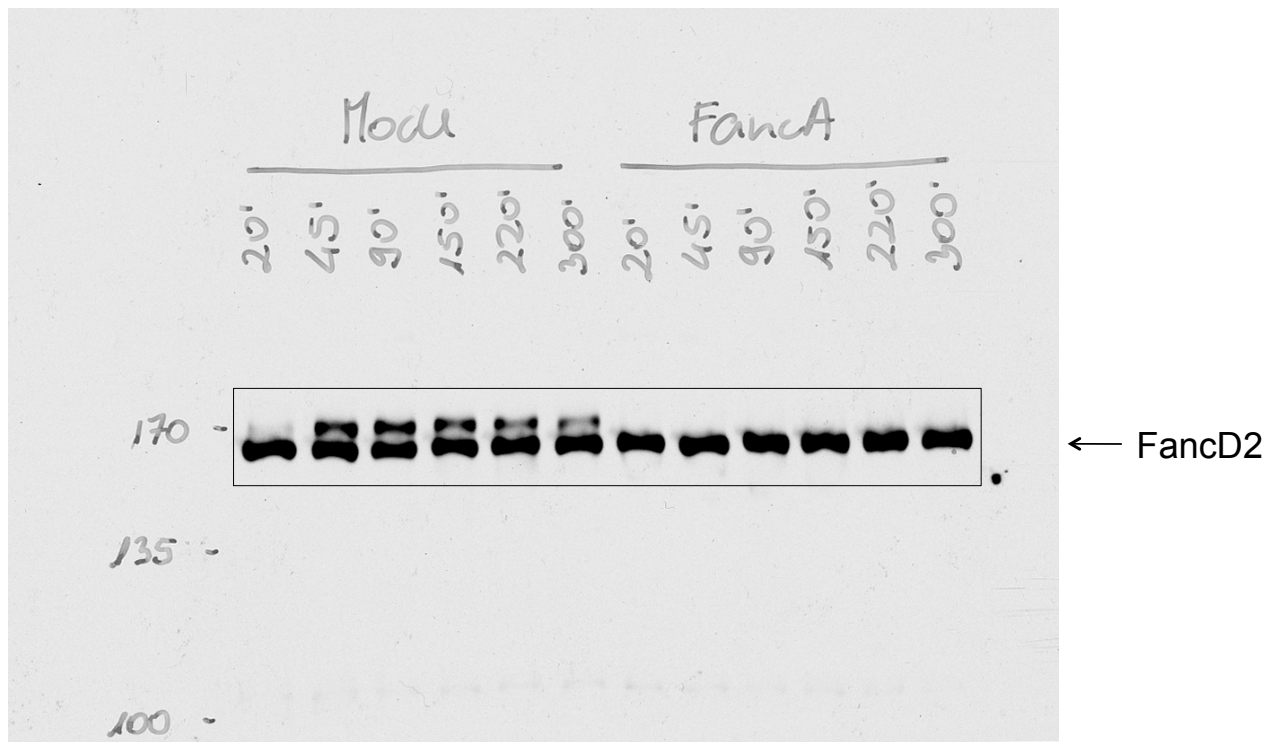

Supplement: embj0034-1971-sd4.pdf [file embj0034-1971-sd4.pdf]

Supplementary Figure S7

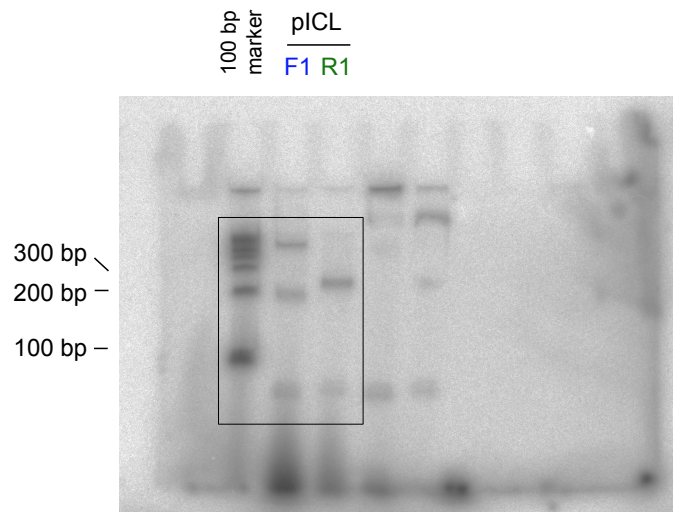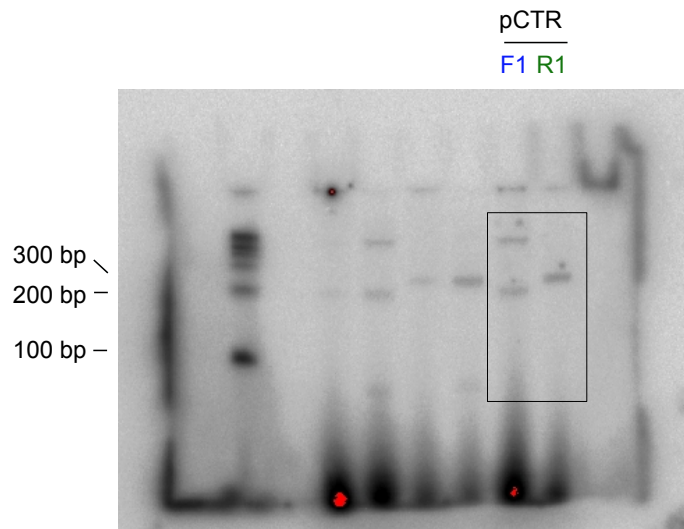

Supplement: embj0034-1971-sd5.pdf [file embj0034-1971-sd5.pdf]

Figure 2 – panel B

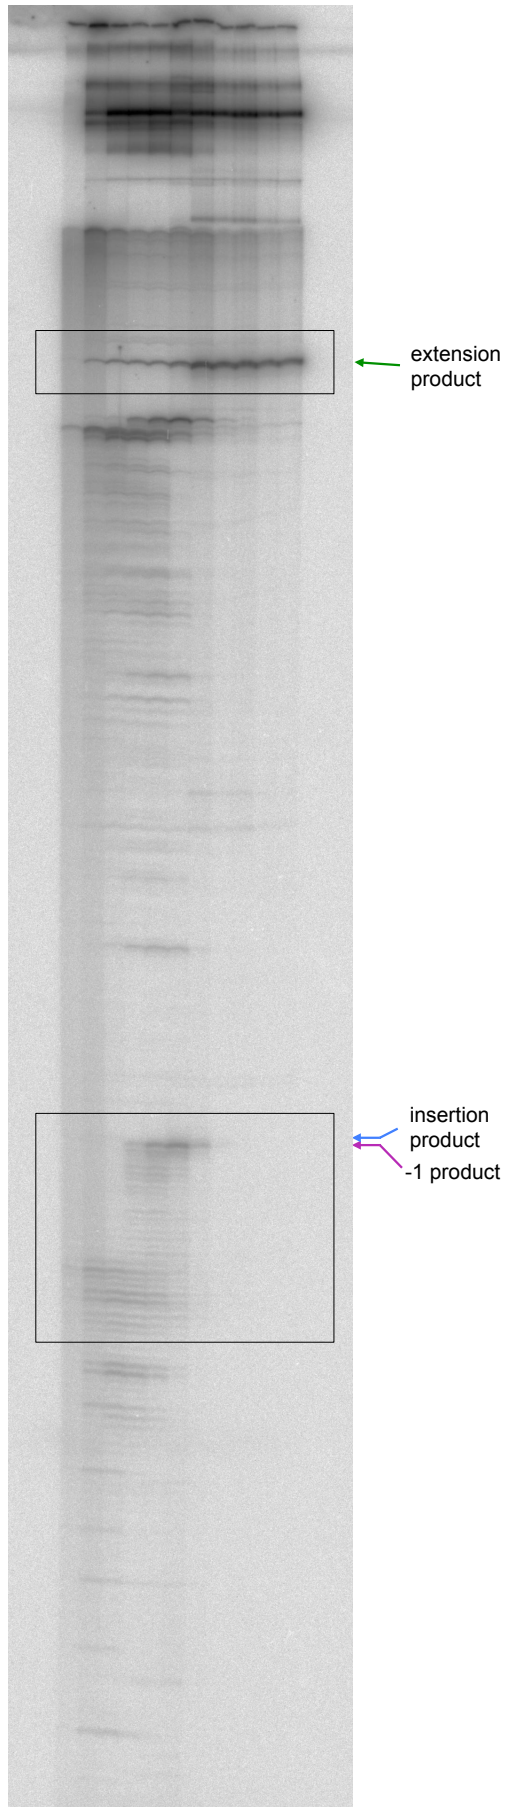

Supplement: embj0034-1971-sd7.pdf [file embj0034-1971-sd7.pdf]

Figure 4 – panel A

anti-Rev1 blot

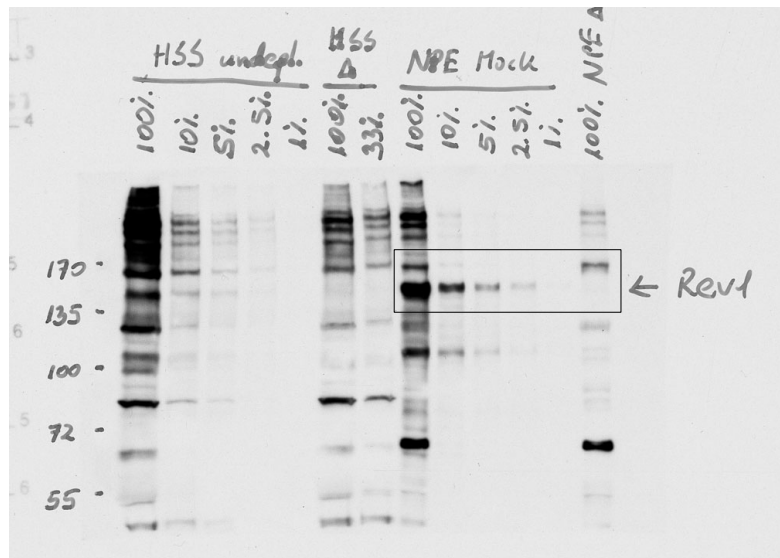

anti-Rev7 blot

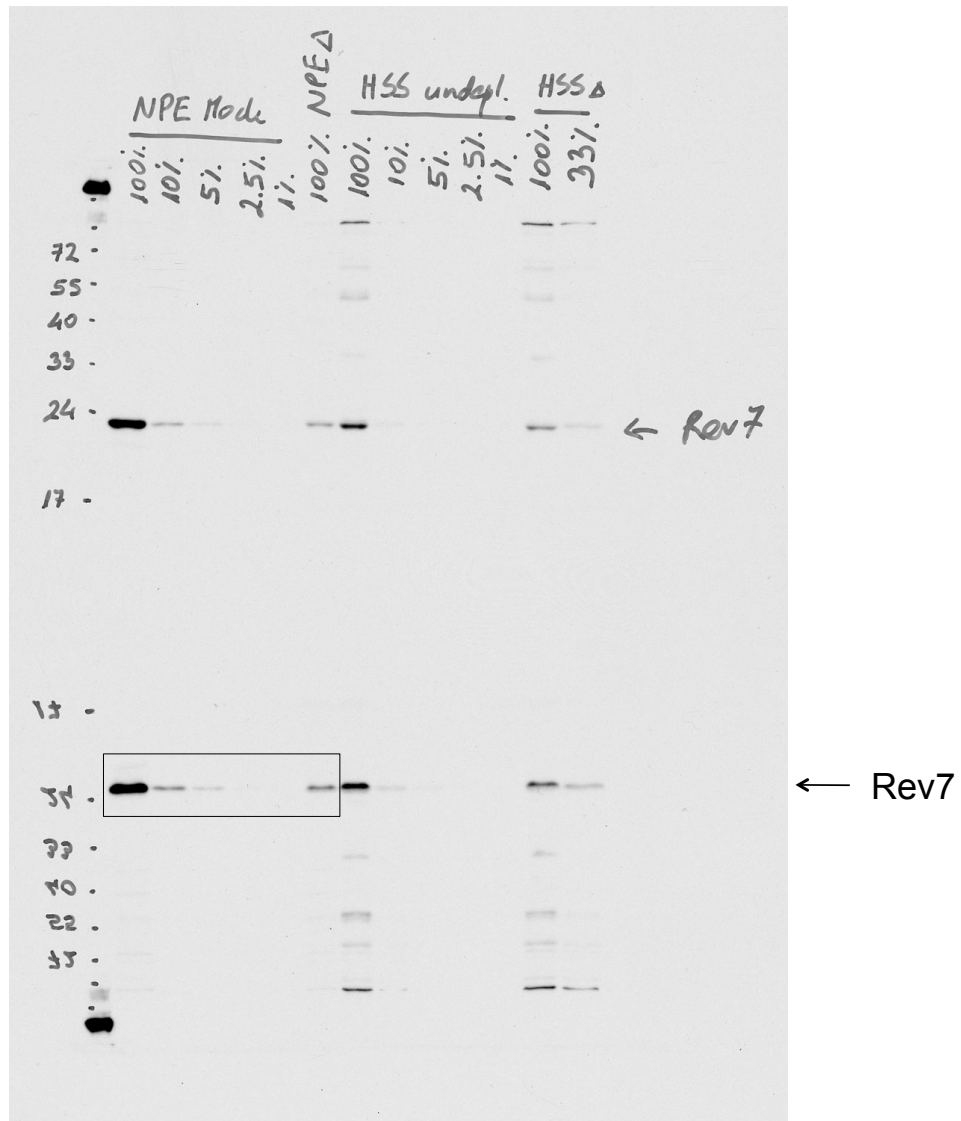

Figure 4 – panel B

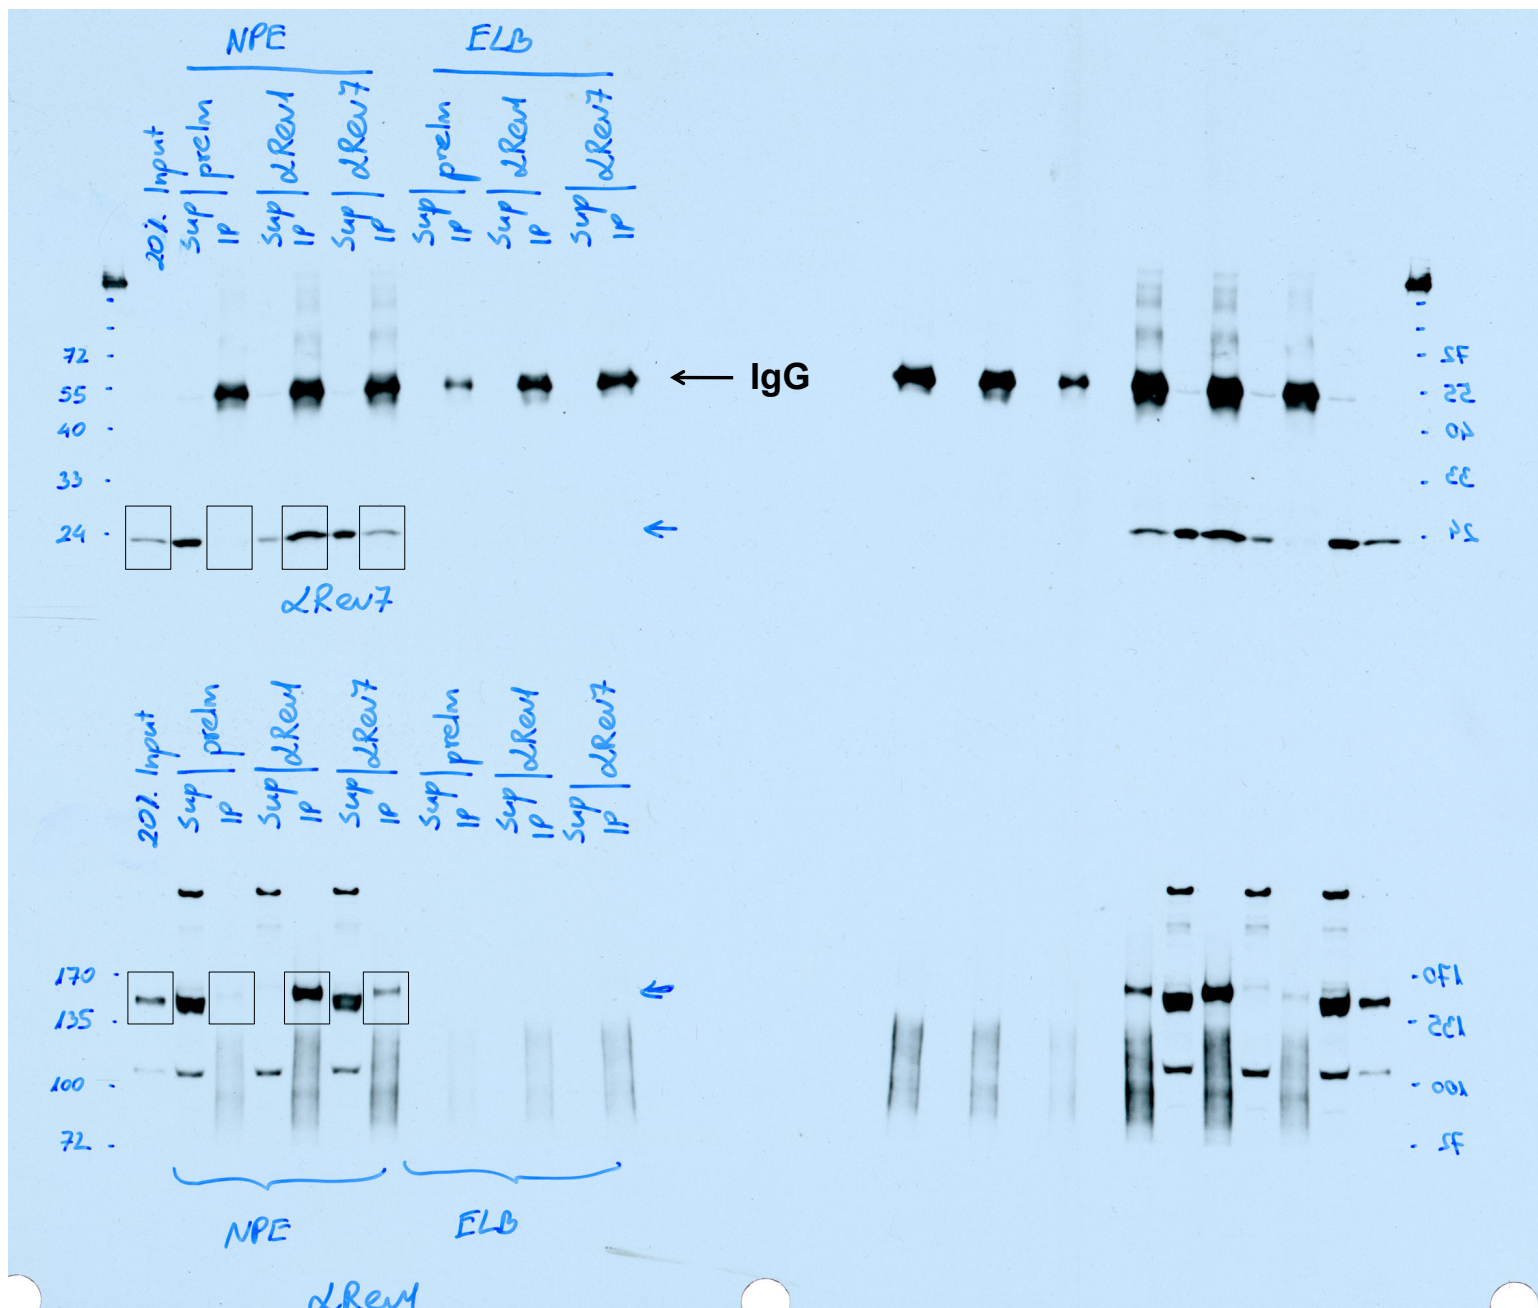

ELB: IP without extract

Figure 4 – panel F

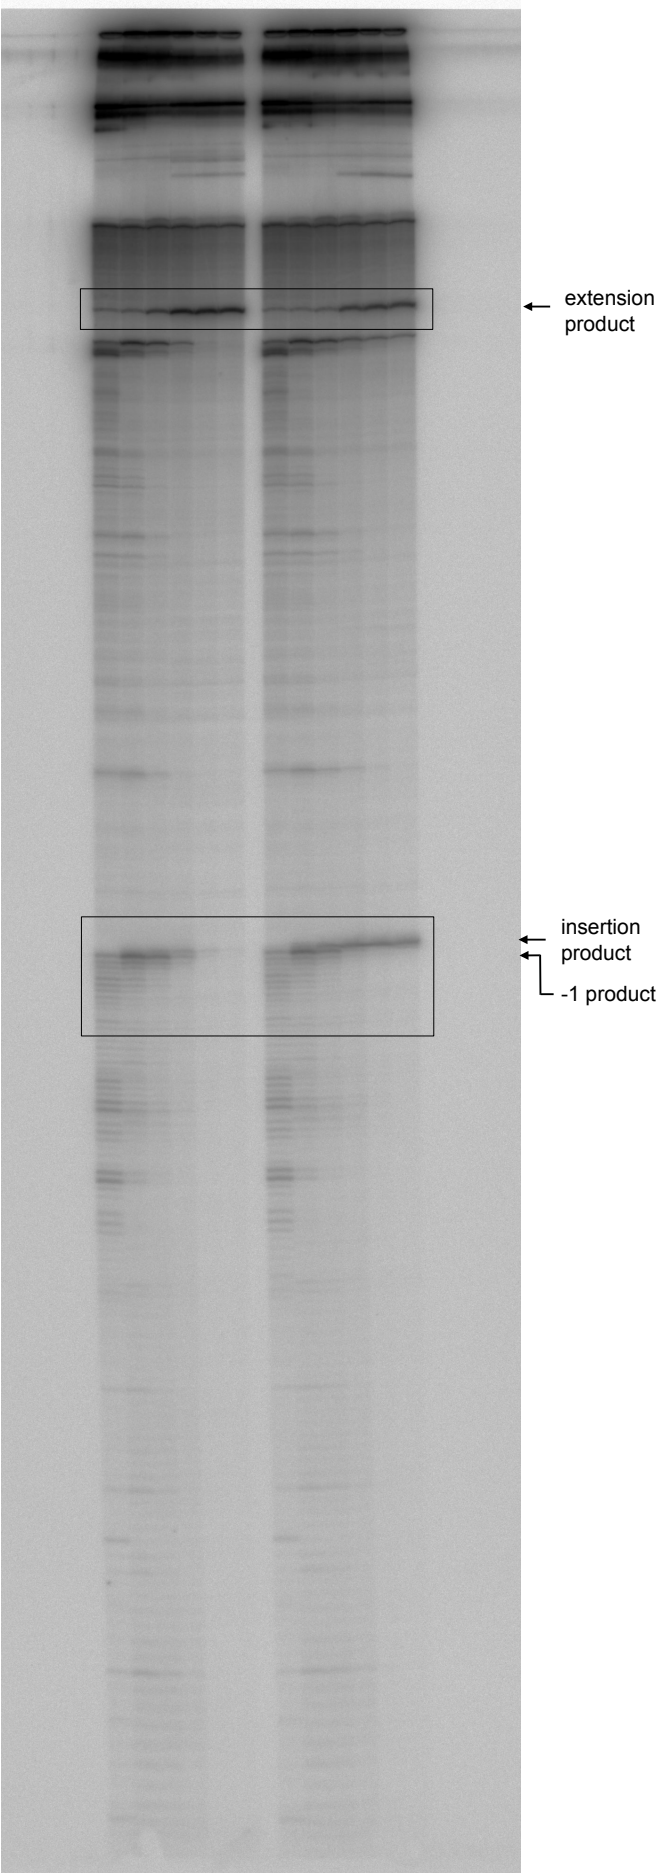

Supplement: embj0034-1971-sd9.pdf [file embj0034-1971-sd9.pdf]
